# Supplementary material for: Leukotriene B4 promotes neovascularization and macrophage recruitment in murine wet-type AMD models
Source: JCI journal article supplement (doi:10.1172/jci.insight.96902), 2018-09-19
Supplement: sd1 [file 1]

**1 SUPPLEMENTAL METHODS**

**2 BM transplantation**

**3** BM cells were collected from the both femurs and tibiae of donor C57BL/6-Ly5.1 mice  
**4** (kindly gifted by Dr. Yoshimura) (Young, 6–8 weeks old; Old, > 20 weeks old) and  $10^7$   
**5** cells were intravenously injected into lethally irradiated (10 Gy X-rays) male WT  
**6** recipients (C57BL/6J-Ly5.2 mice) (Young, 6–8 weeks old; Old, > 20 weeks old). At 28  
**7** days post-transplantation, BM cells and PBL were collected from all chimeras.

**8**

**9 Flow cytometry analysis**

**10** BM cells and PBL were incubated with mouse Fc blocker, followed by staining with  
**11** anti-CD45-FITC (2.5 µg/ml; **clone** 30-F11), anti-CD45.2-PE (2.5 µg/ml; **clone** 104)  
**12** (Thermo Fisher Scientific/eBioscience), and anti-CD45.1-APC (2.5 µg/ml; **clone** A20)  
**13** (Thermo Fisher Scientific/eBioscience). RAW274.7 cells were pretreated with 5 µM  
**14** Pyridone 6 (a JAK1 inhibitor) or 2 µM Cucurbitacin I (a STAT3 inhibitor) (purchased  
**15** from EMD Millipore, Billerica, MA), or DMSO (vehicle, 0.05%) for 1 h, were then  
**16** polarized by exposure to IL-4, IL-10, IL-13, and TGF-β1 (M2) or IFN-γ and LPS (M1)  
**17** for 24 h. Cells were stained with anti-F4/80-FITC (5 µg/ml), anti-CD11b-APC (1.25  
**18** µg/ml), and biotin-labeled anti-mouse BLT1 (1.25 µg/ml) or mouse IgG<sub>1</sub> (1.25 µg/ml)  
**19** Abs. After washing with PBS/EDTA, cells were stained with Streptavidin-PE (0.6  
**20** µg/ml). Cells were washed and then analyzed in a flow cytometer (FACSCalibur or  
**21** FACSVerse). For all experiments, dead cells were excluded after staining with 7AAD.

**22**

**23 Quantitative RT-PCR**

**24** BM cells from WT mice were differentiated into BMDMs by treatment with 50 ng/ml

25 M-CSF for 5 days. BMDMs were cultured without M-CSF for 1 day, were then  
 26 polarized by 2 ng/ml mouse IFN- $\gamma$  and 0.1  $\mu$ g/ml LPS (M1) for 24 h or 50 ng/ml IL-4,  
 27 IL-10, and IL-13 (from mouse) and 4 ng/ml human TGF- $\beta$ 1 (M2) for 48 h. M0  
 28 macrophages were generated by culture in medium without cytokines. cDNA from M0-,  
 29 M1-, and M2-BMDMs was synthesized from total RNA using QuantiTect Reverse  
 30 Transcription kit. Target genes were amplified using a real-time PCR System, DNA  
 31 polymerase, SYBR Green I Dye and specific primers. Gene expression was normalized  
 32 to 18S rRNA (*Rn18s*) using the  $\Delta\Delta$ CT method. The sequences of the primers are as  
 33 follows: *Ltb4r1*: Forward, 5'-ctcggaggtgtccagcac-3' and Reverse,  
 34 5'-gacaggcaggtgtgtccttc-3'; *Rn18s*: Forward, 5'-gcaattattcccatgaacg-3' and Reverse,  
 35 5'-gggacttaatacaacgcaagc-3'; *Mrc1*: Forward, 5'-ccacagcattgaggagtgtg-3', and Reverse,  
 36 5'-acagctcatcatttggtca-3'; *Mgl2*: Forward, 5'-ggagtctccaaagttgtctaa-3', and Reverse,  
 37 5'-agtggtggtccaagagaggat-3'; *Pdcd1lg2*: Forward, 5'-tgtgctgccttttctgtgc-3', and  
 38 Reverse, 5'-gcagcatggtctgtgtcaat-3'; *Arg1*: Forward, 5'-cctgaaggaactgaaaggaaag-3', and  
 39 Reverse, 5'-ttggcagatatgcagggagt-3'; *Retnla*: Forward, 5'-ccctccactgtaacgaagactc-3',  
 40 and Reverse, 5'-cacaccagtagcagtcaccc-3'; *Chil3*: Forward,  
 41 5'-gaacactgagctaaaaactctcctg-3', and Reverse, 5'-gagaccatggcactgaacg-3'; *Nos2*:  
 42 Forward, 5'-gggctgtcacggagatca-3', and Reverse, 5'-ccatgatggtcacattctgc-3'.

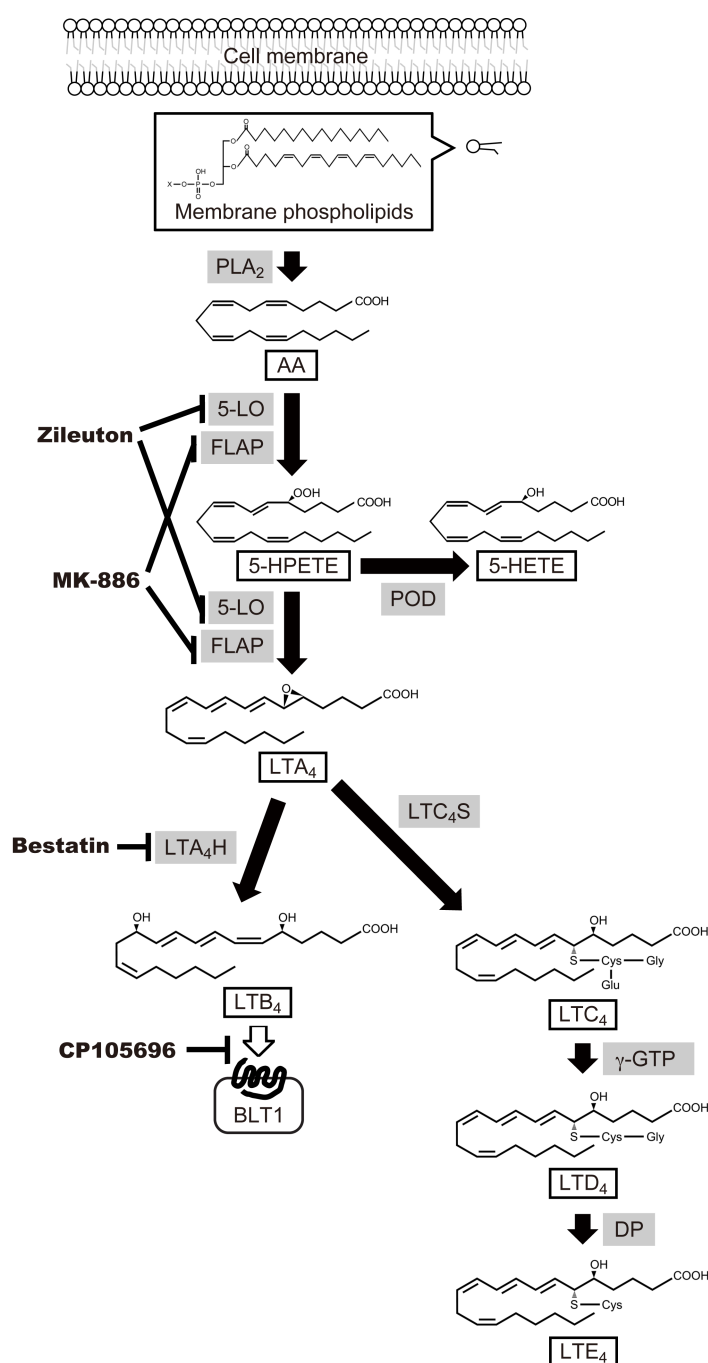

### Supplemental Figure 1. The biosynthetic pathway for the leukotrienes.

LTB<sub>4</sub> is generated from arachidonic acid by 5-LO, FLAP, and LTA<sub>4</sub>H. BLT1 is a high affinity receptor for LTB<sub>4</sub>. Zileuton, 5-LO inhibitor; MK-886, FLAP inhibitor; Bestatin, LTA<sub>4</sub>H inhibitor; CP105696, BLT1 antagonist. AA, arachidonic acid; 5-HPETE, 5-hydroperoxyeicosatetraenoic acid; 5-HETE, 5-hydroxyeicosatetraenoic acid; LTA<sub>4</sub>, leukotriene A<sub>4</sub>; LTB<sub>4</sub>, leukotriene B<sub>4</sub>; LTC<sub>4</sub>, leukotriene C<sub>4</sub>; LTD<sub>4</sub>, leukotriene D<sub>4</sub>; LTE<sub>4</sub>, leukotriene E<sub>4</sub>; Cys, cysteine; Glu, glutamate; Gly, glycine; PLA<sub>2</sub>, phospholipase A<sub>2</sub>; FLAP, 5-lipoxygenase-activating protein; 5-LO, 5-lipoxygenase; POD, peroxidase; LTA<sub>4</sub>H, LTA<sub>4</sub> hydrolase; LTC<sub>4</sub>S, LTC<sub>4</sub> synthase; γ-GTP, γ-glutamyltranspeptidase; DP, dipeptidase.

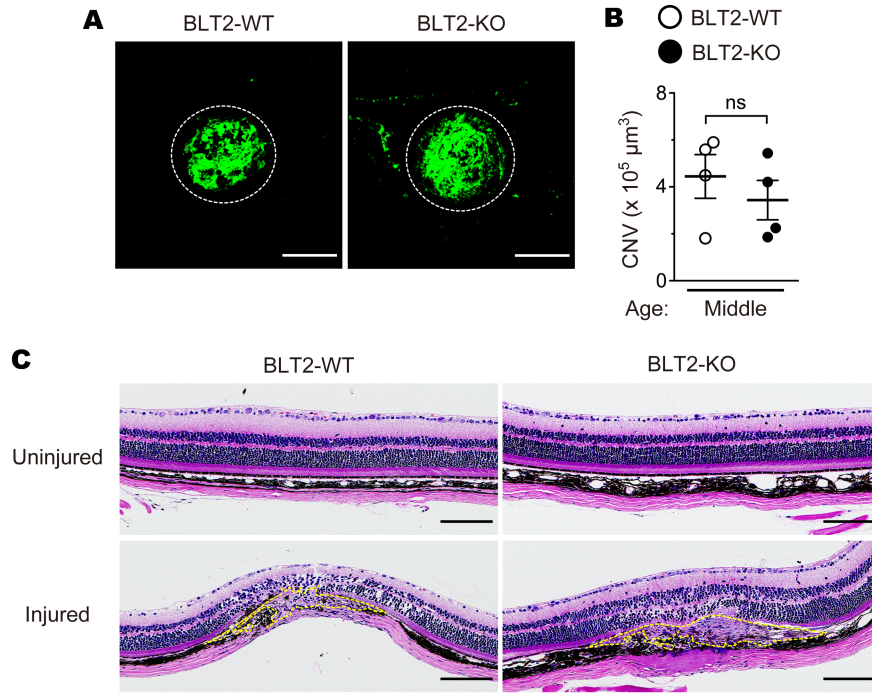

**Supplemental Figure 2. BLT2 is not involved in the AMD pathogenesis.**

CNV images (A) and volume (B) in the laser-injured RPE-choroid from aged BLT2-WT (open circles) and BLT2-KO (filled circles) mice ( $> 20$  weeks old).  $n=4$  mice per group. (C) H&E staining of the uninjured and laser-injured retinas from aged BLT2-WT and BLT2-KO mice ( $> 20$  weeks old). Yellow dotted lines denote the lesion areas. Bar= $100 \mu\text{m}$  (A, C). (B) ns, not significant (Student's  $t$  test). Results are representative of at least two independent experiments.





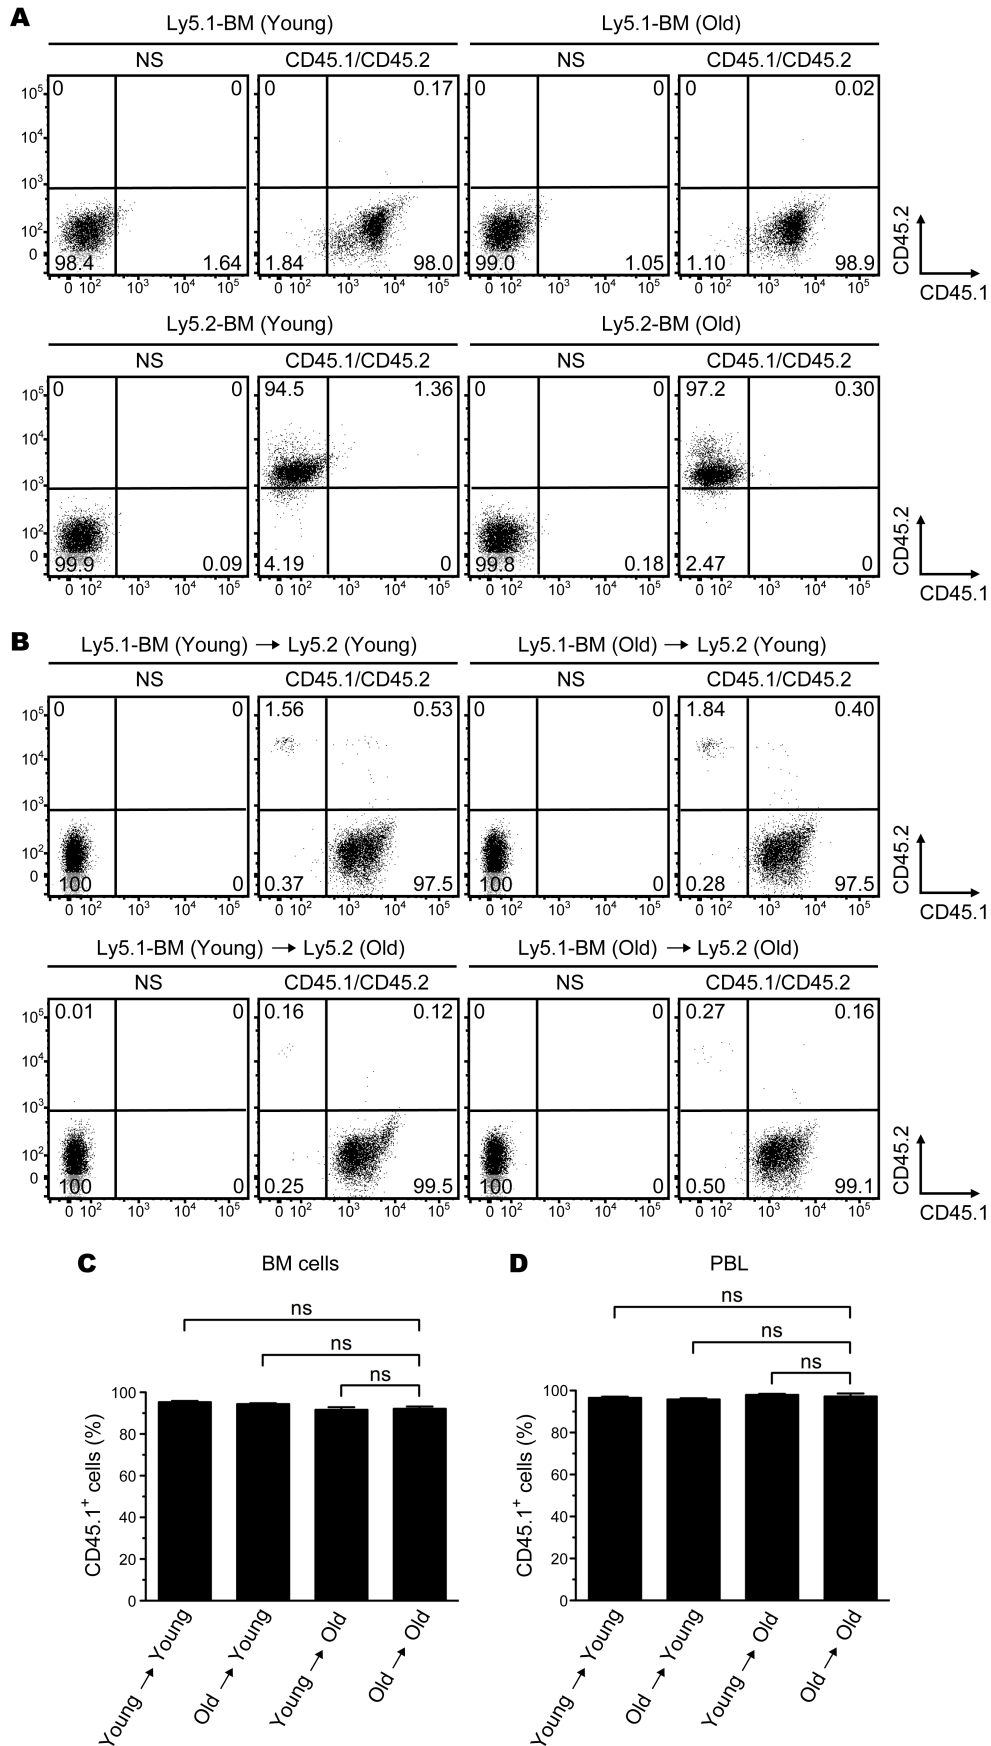

67 Supplemental Figure 4. Generation of BM chimeras using aged donor and

68 **recipient.**

69 (A) FACS analysis of a congenic marker in the BM cells from Ly5.1 (Ly5.1-BM) and  
70 Ly5.2 (Ly5.2-BM) mice (Young, 8 weeks old; Old, > 20 weeks old). Ly5.1 and Ly5.2  
71 mice have CD45.1<sup>+</sup> and CD45.2<sup>+</sup> leukocytes, respectively. (B) FACS analysis of a  
72 congenic marker in the PBL from BM chimeras; Ly5.1-BM cells (Young) into Ly5.2  
73 mice (Young), Ly5.1-BM cells (Old) into Ly5.2 mice (Young), Ly5.1-BM cells (Young)  
74 into Ly5.2 mice (Old), Ly5.1-BM cells (Old) into Ly5.2 mice (Old). (C) Replacement  
75 rate of CD45<sup>+</sup> leukocytes in the BM cells and PBL from BM chimeras. *n*=3–7 per  
76 group. These data were obtained using BM transplantation as described in Supplemental  
77 Methods. ns, not significant (1-way ANOVA with the Bonferroni's *post hoc* test).  
78 Young into Young, Ly5.1-BM cells (Young) into Ly5.2 mice (Young); Old into Young,  
79 Ly5.1-BM cells (Old) into Ly5.2 mice (Young); Young into Old, Ly5.1-BM cells  
80 (Young) into Ly5.2 mice (Old); Old into Old, Ly5.1-BM cells (Old) into Ly5.2 mice  
81 (Old).

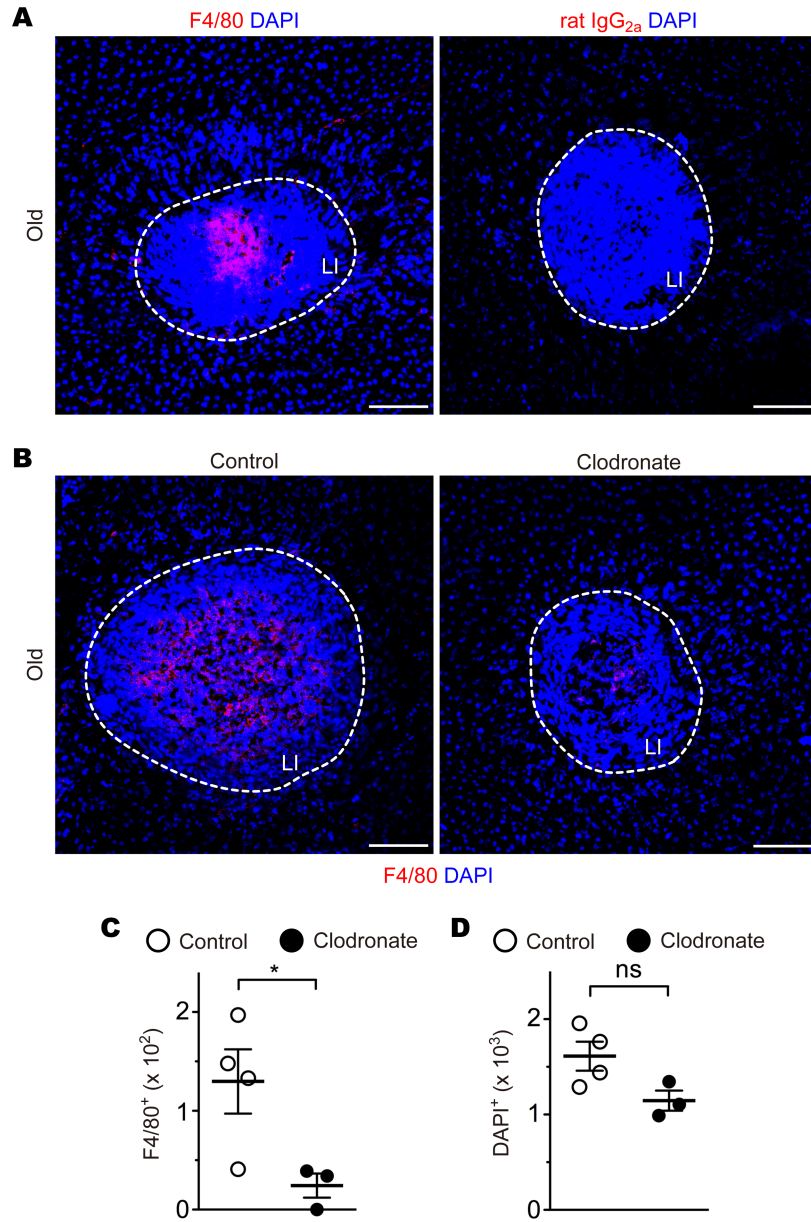

**Supplemental Figure 5. Depletion of macrophages in the laser-injured RPE-choroid using clodronate liposome.**

(A, B) Immunofluorescence staining of uninjected (A) and clodronate or control liposome-injected (B) RPE-choroid from aged WT mice (> 20 weeks old) with anti-F4/80 mAb or rat IgG<sub>2a</sub> as an isotype control (red). Eyes were collected on Day 5 post-laser injury. Nuclei were visualized with DAPI (blue). LI (white dotted lines) denotes the location of laser injury. Control, control liposome; Clodronate, clodronate liposome. (C, D) The number of F4/80<sup>+</sup> (C) and DAPI<sup>+</sup> (D) cells was counted as described above.  $n=3-4$  per group. Bar=100 $\mu$ m (A, B). (C, D) \* $P < 0.05$ ; ns, not significant (Student's  $t$  test).

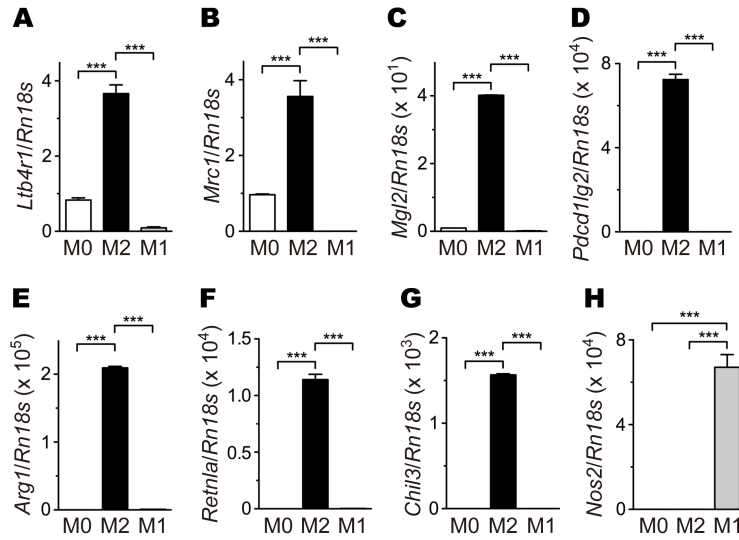

**Supplemental Figure 6. mRNA expression of M1 and M2 macrophage markers.**

Quantitative RT-PCR analysis of mRNA for various M1 and M2 macrophage markers in the M0-, M2, or M1-BMDMs from WT mice as described in Supplemental Methods.  $n=3$  per group. (A-H) \*\*\* $P < 0.005$  (1-way ANOVA with Bonferroni's *post hoc* test).

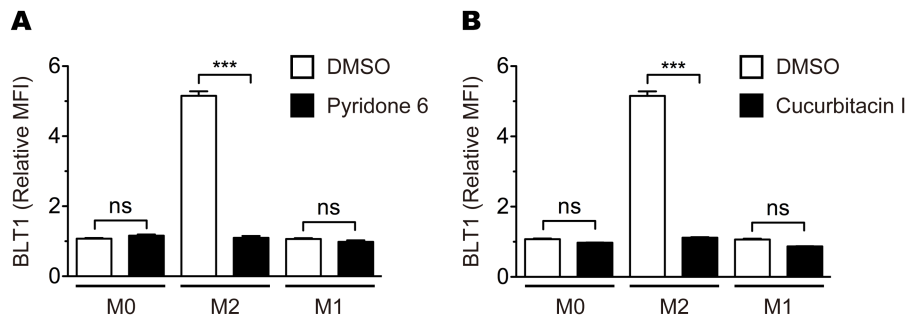

**Supplemental Figure 7. Down-regulation of BLT1 expression in M2-polarized RAW264.7 cells by inhibition of the JAK1-STAT3 signaling pathway.**

FACS analysis of BLT1 expression in M2-RAW264.7 cells after treatment of 5  $\mu$ M Pyridone 6 (a JAK1 inhibitor) or 2  $\mu$ M Cucurbitacin I (a STAT3 inhibitor) (black bars), or vehicle (white bars). The Y-axis shows the MFI relative to that of an isotype control (mouse IgG<sub>1</sub>). MFI, mean fluorescence intensity.  $n=3-9$  per group. (A, B) \*\*\* $P < 0.005$ ; ns, not significant (1-way ANOVA with the Bonferroni's *post hoc* test).

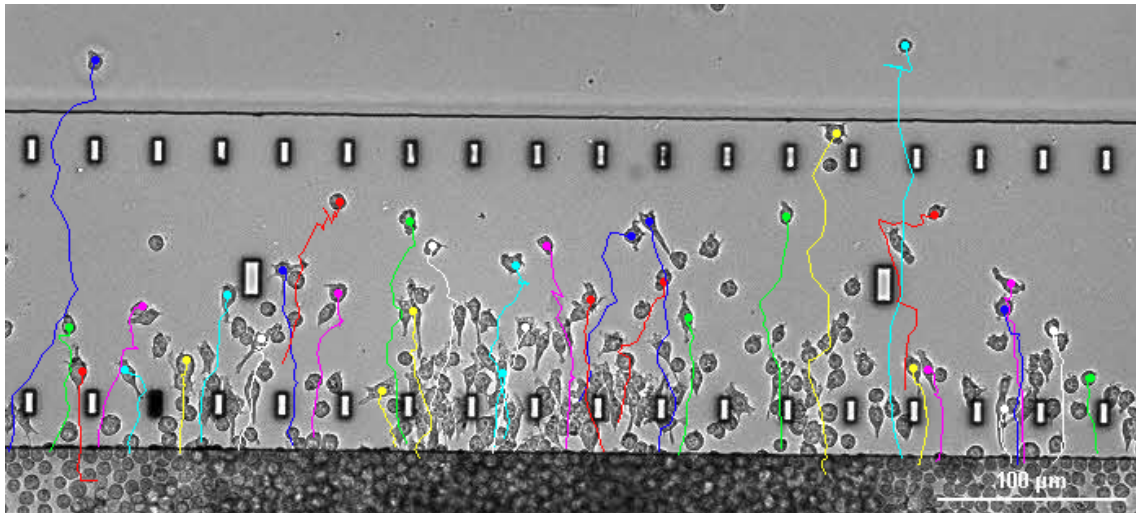

**103** **Supplemental movie 1. Chemotaxis of M2-polarized RAW264.7 cells to LTB<sub>4</sub>.**  
**104** *In vitro* chemotaxis of M2-RAW264.7 cells toward 100 nM LTB<sub>4</sub> was analyzed using  
**105** TAXIScan-FL device. Bar=100 μm.

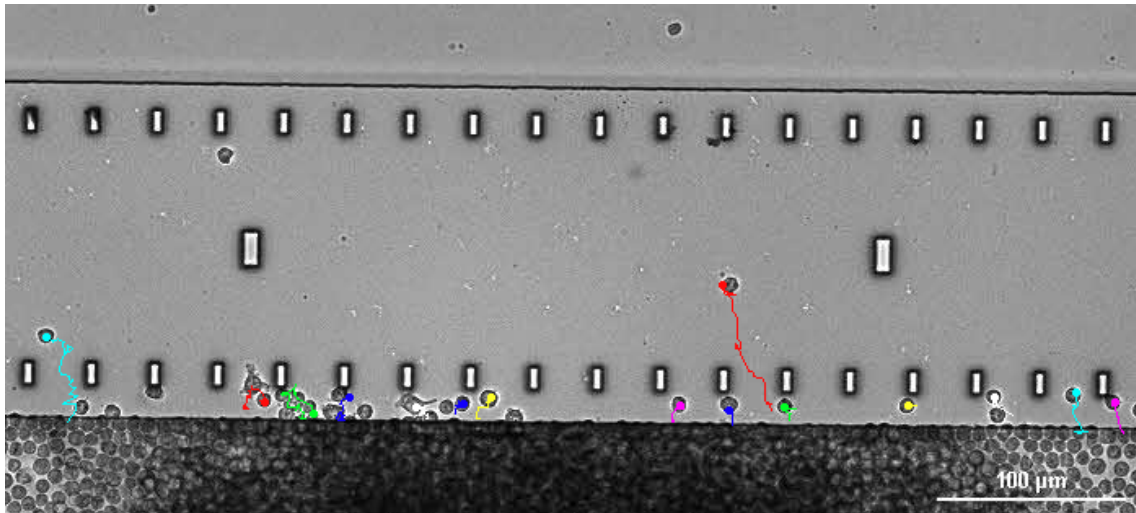

106 Supplemental movie 2. Chemotaxis of M2-polarized RAW264.7 cells to vehicle  
 107 control.

108 *In vitro* chemotaxis of M2-RAW264.7 cells toward ethanol was analyzed using  
 109 TAXIScan-FL device. Bar=100 μm.
